# Supplementary material
Source: MDPI journal article supplement (https://www.mdpi.com/2073-4395/10/9/1371)
Supplement: s1 [file s1]

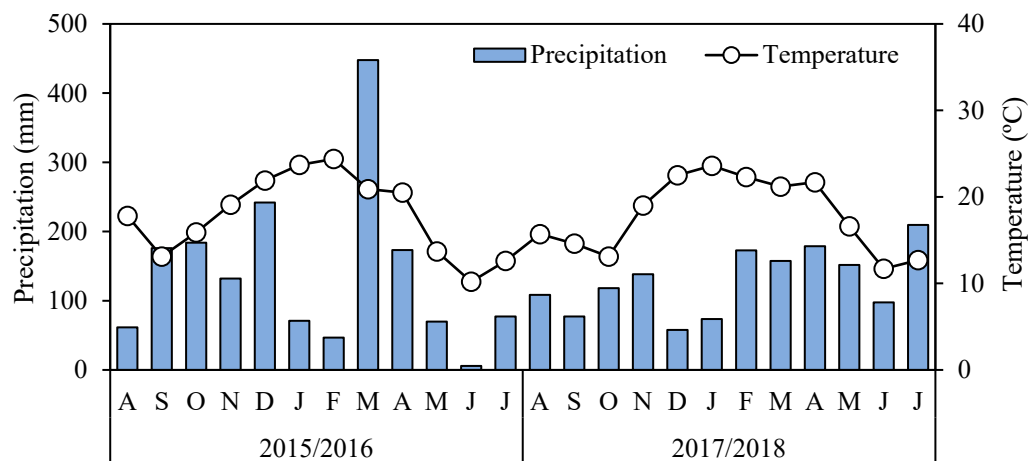

**Figure S1.** Monthly cumulative precipitation and average temperature (from August 2015 to July 2016 and from August 2017 to July 2018) in Cristal County/RS State, site of the experimental area of integrated crop-livestock system in southern Brazil. Source: National meteorological institute, Brazil.
